# Supplementary material for: The genomic mosaicism of hybrid speciation
Source: PubMed Central journal article supplement — Sci Adv. 2017 Jun 14;3(6):e1602996. doi: 10.1126/sciadv.1602996 (PMC5470830; doi:10.1126/sciadv.1602996), 2017-06-14
Supplement: 1602996_SM.pdf [file 1602996_SM.pdf]

## Supplementary Materials for

### **The genomic mosaicism of hybrid speciation**

Tore O. Elgvin, Cassandra N. Trier, Ole K. Tørresen, Ingerid J. Hagen, Sigbjørn Lien, Alexander J. Nederbragt, Mark Ravinet, Henrik Jensen, Glenn-Peter Sætre

Published 14 June 2017, *Sci. Adv.* **3**, e1602996 (2017)

DOI: 10.1126/sciadv.1602996

#### **This PDF file includes:**

- fig. S1. Stepping window ADMIXTURE and RAxML analyses across the Italian sparrow genome.
- fig. S2. LD decay across all chromosomes.
- fig. S3. Mitochondrial sequence divergence between each Italian sparrow and the parent populations.
- fig. S4. Divergence peaks between the Italian sparrow and either parent taxa on microchromosomes.
- fig. S5. Divergence peaks for PI regions on large chromosomes.
- fig. S6. Population structuring analysis of sparrow individuals.
- table S1. Sequencing scheme for the house sparrow reference genome assembly.
- table S2. Final assembly statistics.
- table S3. Sample information.
- table S4. Results from genome-wide RAxML analysis.
- table S5. Comparison of resolved RAxML phylogenies at variable window sizes.
- table S6. ENSEMBLE gene IDs for genes within top divergence windows.
- table S7. Significantly enriched GO pathways from ClueGo analysis in HI outlier windows.
- table S8. Significantly enriched GO pathways from ClueGo analysis in SI outlier windows.
- table S9. Significantly enriched GO pathways from ClueGo analysis in PI outlier windows.
- table S10. Genes among outlier windows identified as candidates for the involvement in melanogenesis and RI in sparrows.
- table S11. Significantly enriched GO pathways from ClueGo analysis HI outlier windows with chickens as the reference genome.

- table S12. Significantly enriched GO pathways from ClueGo analysis in SI outlier windows with chickens as the reference genome.
- table S13. Significantly enriched GO pathways from ClueGo analysis in PI outlier windows with chickens as the reference genome.

## Supplementary Materials

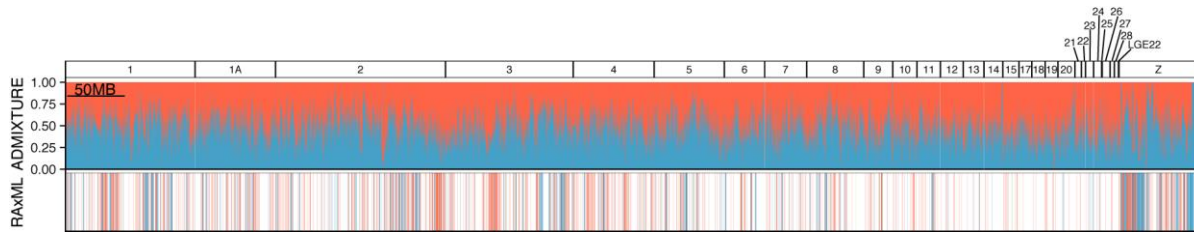

**fig. S1. Stepping window ADMIXTURE and RAxML analyses across the Italian sparrow genome.** On the top panel, the results from 100kb stepping window ADMIXTURE analysis across the Italian sparrow genome with assignment probabilities to house sparrow ancestry (blue) and Spanish sparrow ancestry (red) on the y-axis. The bottom panel depicts 100kb windows where the Italian sparrow grouped monophyletically with the house (blue), Spanish (red) or in its own clade (green) according to RAxML analysis across the genome.

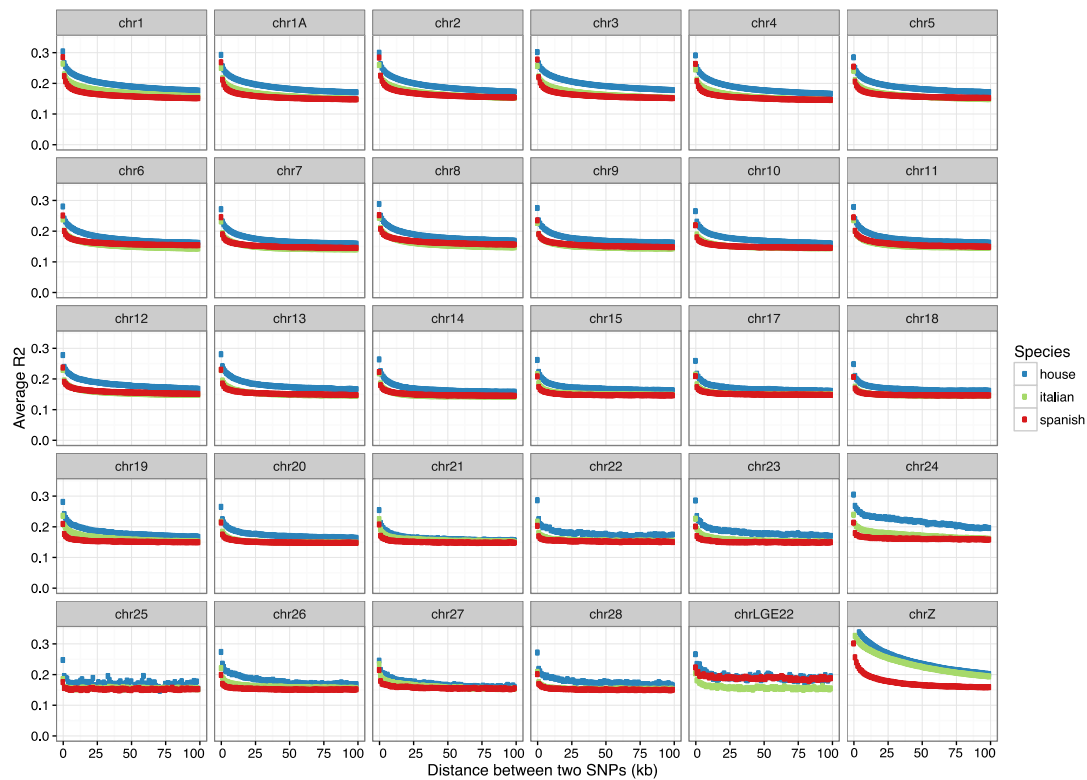

**fig. S2. LD decay across all chromosomes.** Pairwise  $r^2$  values for all SNPs genotyped in at least 80% of individuals within each population in a 100 kb window binned in 1kb increments. Decay of linkage disequilibrium is plotted by distance between SNPs for the house (blue), Italian (green) and Spanish (red) sparrow populations.

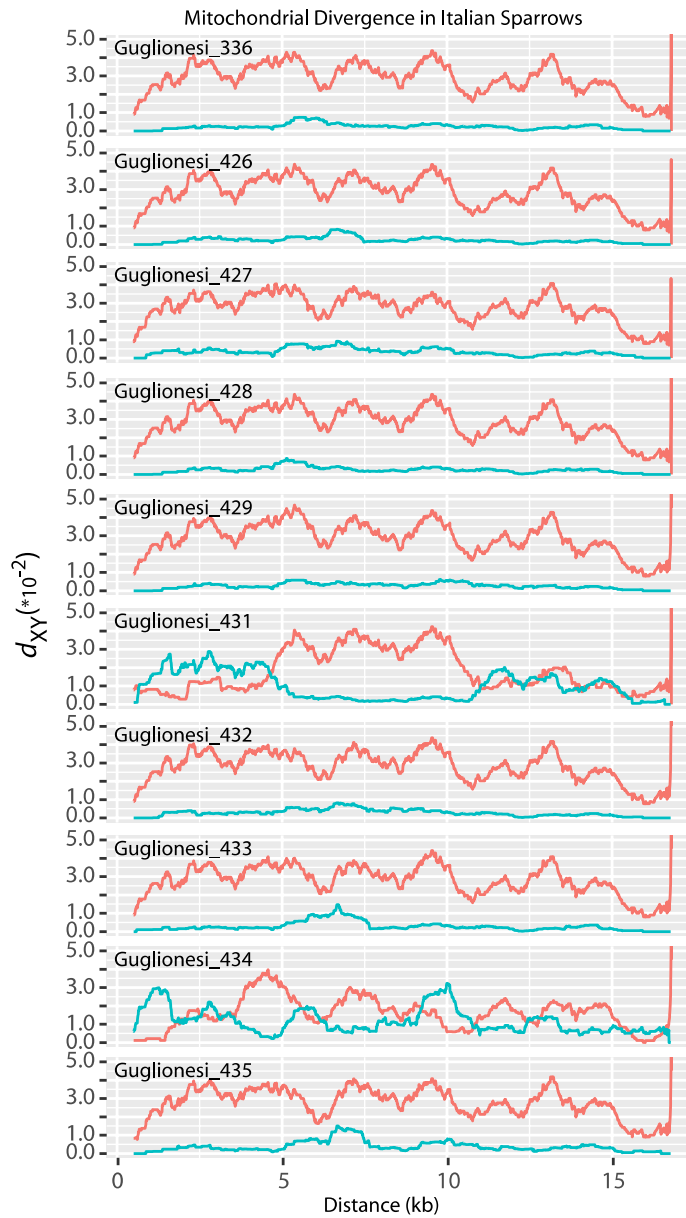

**fig. S3. Mitochondrial sequence divergence between each Italian sparrow and the parent populations.** Plots of overlapping sliding window (1kb window, 100bp step)  $d_{XY}$  estimates along the mitochondria of the house and Italian (blue), and Spanish and Italian (red) sparrows for all ten Italian sparrow individuals.

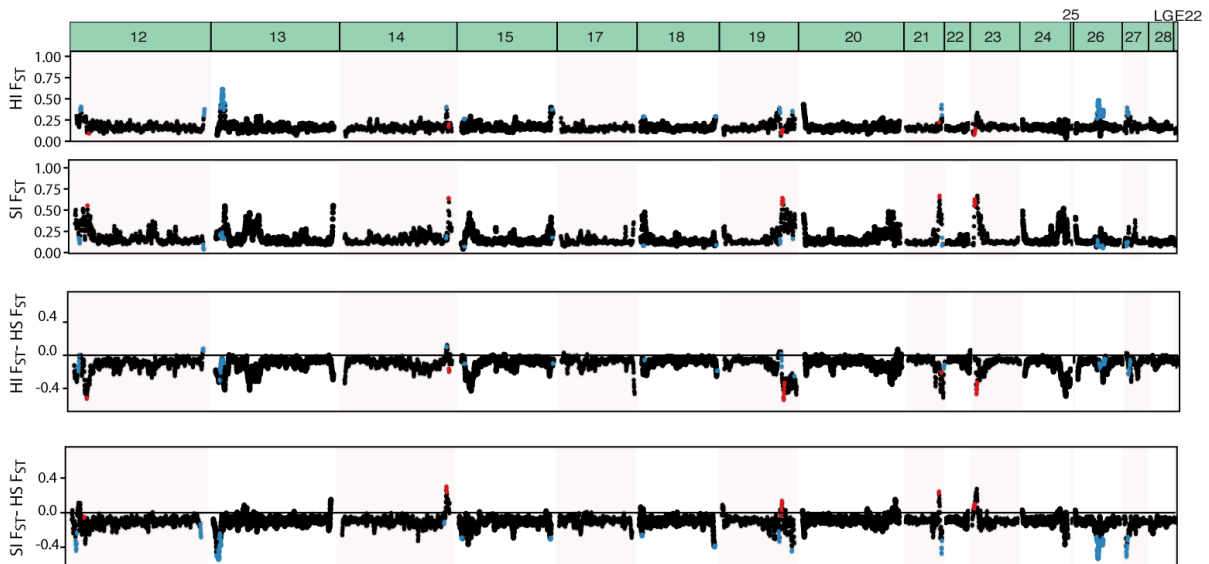

**fig. S4. Divergence peaks between the Italian sparrow and either parent taxa on microchromosomes.**  $F_{ST}$  plot for the HI (top), and SI comparisons (second from top) for 100kb overlapping windows with 25kb steps across the genome. The bottom two panels display the disparities in  $F_{ST}$  values between each SI and HI comparison from the parent species comparison for the same 100kb overlapping windows. Windows identified as HI divergence peaks are shown in blue, SI in red, and PI peaks in green.

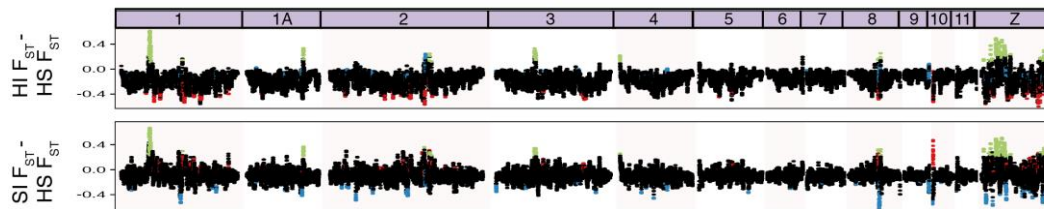

**fig. S5. Divergence peaks for PI regions on large chromosomes.**  $F_{ST}$  disparities between the HI and HS comparisons for 100kb overlapping windows with 25 kb steps across the large chromosomes (top) and disparities between SI and HS comparisons in the bottom panel. HI divergence peaks are shown in blue, SI in red, PI in green.

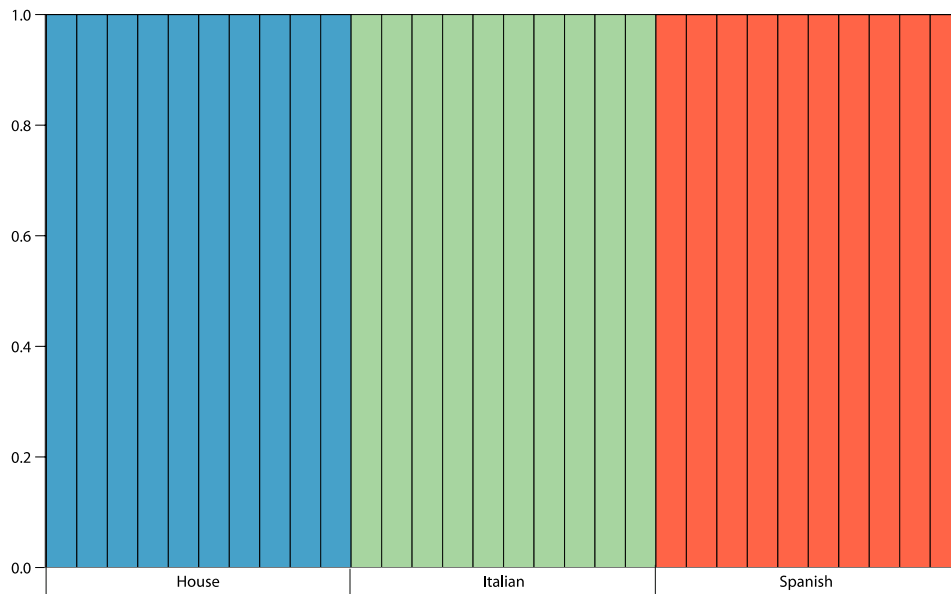

**fig. S6. Population structuring analysis of sparrow individuals.** Results from NgsAdmix analysis of house, Italian and Spanish sparrows (K=3). Species are labelled along the x-axis while the y-axis is the probability of ancestry to the given assignment group.

**table S1. Sequencing scheme for the house sparrow reference genome assembly.**

| Type       | Insert size (bp) | Read length (bp) | # of reads    | Coverage* |
|------------|------------------|------------------|---------------|-----------|
| Paired end | 180              | 100              | 601,573,350   | 49.7      |
| Mate Pair  | 3,000            | 100              | 566,727,504   | 46.8      |
| Mate Pair  | 8,000            | 100              | 245,671,168   | 20.3      |
| Mate Pair  | 10,000           | 100              | 166,477,940   | 13.8      |
| Total      |                  |                  | 1,580,449,962 | 130.6     |

\*Coverage per library - calculated from the estimated genome size from the ALLPATHS-LG output, i.e. (number of reads x read length)/genome size.

**table S2. Final assembly statistics.** Descriptive statistics for the scaffolded (including linkage groups) house sparrow reference genome following the Assemblathon parameters (56).

|                                                                 |               |        |
|-----------------------------------------------------------------|---------------|--------|
| <b>Number of scaffolds</b>                                      | 2,301         |        |
| <b>Total size of scaffolds</b>                                  | 1,042,720,703 |        |
| <b>Longest scaffold</b>                                         | 147,836,772   |        |
| <b>Shortest scaffold</b>                                        | 1,000         |        |
| <b>Number of scaffolds &gt; 500 nt</b>                          | 2,301         | 100.0% |
| <b>Number of scaffolds &gt; 1K nt</b>                           | 2,300         | 100.0% |
| <b>Number of scaffolds &gt; 10K nt</b>                          | 748           | 32.5%  |
| <b>Number of scaffolds &gt; 100K nt</b>                         | 170           | 7.4%   |
| <b>Number of scaffolds &gt; 1M nt</b>                           | 30            | 1.3%   |
| <b>Mean scaffold size</b>                                       | 453,160       |        |
| <b>Median scaffold size</b>                                     | 1,756         |        |
| <b>N50 scaffold length</b>                                      | 68,733,010    |        |
| <b>L50 scaffold count</b>                                       | 6             |        |
| <b>N50 scaffold - NG50 scaffold length difference</b>           | 68,733,010    |        |
| <b>scaffold %A</b>                                              | 27.94         |        |
| <b>scaffold %C</b>                                              | 19.96         |        |
| <b>scaffold %G</b>                                              | 19.99         |        |
| <b>scaffold %T</b>                                              | 27.99         |        |
| <b>scaffold %N</b>                                              | 4.12          |        |
| <b>scaffold N nt</b>                                            | 42,993,395    |        |
| <b>scaffold %non-ACGTN</b>                                      | 0             |        |
| <b>Number of scaffold non-ACGTN nt</b>                          | 0             |        |
| <b>Percentage of assembly in scaffolded contigs</b>             | 99.8%         |        |
| <b>Percentage of assembly in unscaffolded contigs</b>           | 0.2%          |        |
| <b>Average number of contigs per scaffold</b>                   | 19            |        |
| <b>Average length of breaks (20 or more Ns) between contigs</b> | 1,037         |        |
|                                                                 |               |        |
| <b>Number of contigs</b>                                        | 43,686        |        |
| <b>Number of contigs in scaffolds</b>                           | 42,359        |        |
| <b>Number of contigs not in scaffolds</b>                       | 1,327         |        |
| <b>Total size of contigs</b>                                    | 999,796,755   |        |
| <b>Longest contig</b>                                           | 681,761       |        |
| <b>Shortest contig</b>                                          | 217           |        |

|                                                   |        |       |
|---------------------------------------------------|--------|-------|
| <b>Number of contigs &gt; 500 nt</b>              | 43,578 | 99.8% |
| <b>Number of contigs &gt; 1K nt</b>               | 43,091 | 98.6% |
| <b>Number of contigs &gt; 10K nt</b>              | 19,201 | 44.0% |
| <b>Number of contigs &gt; 100K nt</b>             | 2,091  | 4.8%  |
| <b>Number of contigs &gt; 1M nt</b>               | 0      | 0.00% |
| <b>Mean contig size</b>                           | 22,886 |       |
| <b>Median contig size</b>                         | 7,568  |       |
| <b>N50 contig length</b>                          | 65,274 |       |
| <b>L50 contig count</b>                           | 4,069  |       |
| <b>N50 contig - NG50 contig length difference</b> | 65,274 |       |
| <b>contig %A</b>                                  | 29.14  |       |
| <b>contig %C</b>                                  | 20.81  |       |
| <b>contig %G</b>                                  | 20.85  |       |
| <b>contig %T</b>                                  | 29.19  |       |
| <b>contig %N</b>                                  | 0.01   |       |
| <b>contig N nt</b>                                | 69,447 |       |
| <b>contig %non-ACGTN</b>                          | 0      |       |



**table S3. Sample information.**

| Species                                            | Sample ID                  | Sex      | Date     | Location             | Latitude              | Longitude          |
|----------------------------------------------------|----------------------------|----------|----------|----------------------|-----------------------|--------------------|
| <i>P. domesticus</i><br>BIOSAMPLE:<br>SAMN02929199 | 8887266                    | <i>F</i> | 08/08/02 | Aldra, Norway        | ~ 66° 24' 03"<br>N    | ~ 13° 06' 29" E    |
| <i>P. domesticus</i>                               | 8L19786                    | <i>M</i> | 7/4/07   | Alta, Norway         | ~ 69° 58' 23."<br>N   | ~ 23° 29' 01" E    |
| <i>P. domesticus</i>                               | 8L64869                    | <i>M</i> | 2/10/09  | Leka, Norway         | ~ 65° 05' 28"<br>N    | ~ 11° 43' 20" E    |
| <i>P. domesticus</i>                               | 8L89915                    | <i>M</i> | 5/21/09  | Træna,<br>Norway     | ~ 66° 30' 04"<br>N    | ~ 12° 06' 02" E    |
| <i>P. domesticus</i>                               | 8M31651                    | <i>M</i> | 2/14/10  | Leka, Norway         | ~ 65° 05' 53"<br>N    | ~ 11° 42' 00" E    |
| <i>P. domesticus</i>                               | 8M71932                    | <i>M</i> | 3/30/11  | Løkta, Norway        | ~ 66° 10' 51"<br>N    | ~ 12° 43' 16" E    |
| <i>P. domesticus</i>                               | 8M72455                    | <i>M</i> | 7/5/10   | Kvål, Norway         | ~ 63° 14' 12"<br>N    | ~ 10° 16' 33" E    |
| <i>P. domesticus</i>                               | 8N05890                    | <i>M</i> | 2/20/12  | Leka, Norway         | ~ 65° 02' 58"<br>N    | ~ 11° 36' 12" E    |
| <i>P. domesticus</i>                               | 8N06612                    | <i>M</i> | 2/4/12   | Linesøya,<br>Norway  | ~ 64° 01' 40"<br>N    | ~ 09° 55' 15" E    |
| <i>P. domesticus</i>                               | 8N73248                    | <i>M</i> | 3/6/13   | Lauvøya,<br>Norway   | ~ 63° 55' 36"<br>N    | ~ 09° 56' 07" E    |
| <i>P. domesticus</i>                               | 8N73604                    | <i>M</i> | 3/7/13   | Lauvøya,<br>Norway   | ~ 63° 55' 36"<br>N    | ~ 09° 56' 07" E    |
| <i>P. hispaniolensis</i>                           | Phisp_11_Lesina_280        | <i>M</i> | 4/2/08   | Lesina, Italy        | ~ 41° 51'<br>30.84" N | ~ 15° 27' 03"<br>E |
| <i>P. hispaniolensis</i>                           | Phisp_12_Lesina_281        | <i>M</i> | 4/2/08   | Lesina, Italy        | ~ 41° 51'<br>30.84" N | ~ 15° 27' 03"<br>E |
| <i>P. hispaniolensis</i>                           | Phisp_13_Lesina_282        | <i>M</i> | 4/2/08   | Lesina, Italy        | ~ 41° 51'<br>30.84" N | ~ 15° 27' 03"<br>E |
| <i>P. hispaniolensis</i>                           | Phisp_14_Lesina_285        | <i>M</i> | 4/2/08   | Lesina, Italy        | ~ 41° 51'<br>30.84" N | ~ 15° 27' 03"<br>E |
| <i>P. hispaniolensis</i>                           | Phisp_15_Lesina_286        | <i>M</i> | 4/2/08   | Lesina, Italy        | ~ 41° 51'<br>30.84" N | ~ 15° 27' 03"<br>E |
| <i>P. hispaniolensis</i>                           | Phisp_16_Lesina_287        | <i>M</i> | 4/2/08   | Lesina, Italy        | ~ 41° 51'<br>30.84" N | ~ 15° 27' 03"<br>E |
| <i>P. hispaniolensis</i>                           | Phisp_17_Lesina_288        | <i>M</i> | 4/2/08   | Lesina, Italy        | ~ 41° 51'<br>30.84" N | ~ 15° 27' 03"<br>E |
| <i>P. hispaniolensis</i>                           | Phisp_18_Lesina_289        | <i>M</i> | 4/2/08   | Lesina, Italy        | ~ 41° 51'<br>30.84" N | ~ 15° 27' 03"<br>E |
| <i>P. hispaniolensis</i>                           | Phisp_19_Lesina_292        | <i>M</i> | 4/2/08   | Lesina, Italy        | ~ 41° 51'<br>30.84" N | ~ 15° 27' 03"<br>E |
| <i>P. hispaniolensis</i>                           | Phisp_20_Lesina_295        | <i>M</i> | 4/2/08   | Lesina, Italy        | ~ 41° 51'<br>30.84" N | ~ 15° 27' 03"<br>E |
| <i>P. italiae</i>                                  | Pitaliae_21_Guglionesi_426 | <i>M</i> | 4/15/08  | Guglionesi,<br>Italy | ~ 41° 54'<br>48.25" N | ~ 14° 54' 50"<br>E |
| <i>P. italiae</i>                                  | Pitaliae_22_Guglionesi_427 | <i>M</i> | 4/15/08  | Guglionesi,<br>Italy | ~ 41° 54'<br>48.25" N | ~ 14° 54' 50"<br>E |
| <i>P. italiae</i>                                  | Pitaliae_23_Guglionesi_428 | <i>M</i> | 4/15/08  | Guglionesi,<br>Italy | ~ 41° 54'<br>48.25" N | ~ 14° 54' 50"<br>E |
| <i>P. itallae</i>                                  | Pitaliae_24_Guglionesi_429 | <i>M</i> | 4/15/08  | Guglionesi,<br>Italy | ~ 41° 54'<br>48.25" N | ~ 14° 54' 50"<br>E |
| <i>P. italiae</i>                                  | Pitaliae_25_Guglionesi_431 | <i>M</i> | 4/15/08  | Guglionesi,<br>Italy | ~ 41° 54'<br>48.25" N | ~ 14° 54' 50"<br>E |

|                    |                            |          |         |                          |                       |                     |
|--------------------|----------------------------|----------|---------|--------------------------|-----------------------|---------------------|
| <i>P. italiae</i>  | Pitaliae_26_Guglionesi_432 | <i>M</i> | 4/15/08 | Guglionesi,<br>Italy     | ~ 41° 54'<br>48.25" N | ~ 14° 54' 50"<br>E  |
| <i>P. italiae</i>  | Pitaliae_27_Guglionesi_433 | <i>M</i> | 4/15/08 | Guglionesi,<br>Italy     | ~ 41° 54'<br>48.25" N | ~ 14° 54' 50"<br>E  |
| <i>P. italiae</i>  | Pitaliae_28_Guglionesi_434 | <i>M</i> | 4/15/08 | Guglionesi,<br>Italy     | ~ 41° 54'<br>48.25" N | ~ 14° 54' 50"<br>E  |
| <i>P. italiae</i>  | Pitaliae_29_Guglionesi_435 | <i>M</i> | 4/15/08 | Guglionesi,<br>Italy     | ~ 41° 54'<br>48.25" N | ~ 14° 54' 50"<br>E  |
| <i>P. italiae</i>  | Pitaliae_30_Guglionesi_336 | <i>M</i> | 4/15/08 | Guglionesi,<br>Italy     | ~ 41° 54'<br>48.25" N | ~ 14° 54' 50."<br>E |
| <i>P. montanus</i> | Pmontanus_1_Naxos_2        | <i>M</i> | 4/17/08 | Giardina<br>Naxos, Italy | ~ 37° 49'<br>08.91" N | ~ 15° 16' 12."<br>E |

**table S4. Results from genome-wide RAxML analysis.**

| <b>Chromosome</b> | <b>HI Resolved<br/>Phylogenies<br/>(%)</b> | <b>PI Resolved<br/>Phylogenies<br/>(%)</b> | <b>SI Resolved<br/>Phylogenies<br/>(%)</b> | <b>Unresolved<br/>Phylogenies<br/>(%)</b> |
|-------------------|--------------------------------------------|--------------------------------------------|--------------------------------------------|-------------------------------------------|
| 1                 | 13.8                                       | 0.3                                        | 16.6                                       | 69.4                                      |
| 1A                | 7.7                                        | 0.7                                        | 13.9                                       | 77.7                                      |
| 2                 | 10.3                                       | 1.1                                        | 17.0                                       | 71.6                                      |
| 3                 | 10.1                                       | 1.6                                        | 17.3                                       | 71.0                                      |
| 4                 | 5.1                                        | 0.6                                        | 19.2                                       | 75.1                                      |
| 5                 | 8.3                                        | 1.5                                        | 10.8                                       | 79.4                                      |
| 6                 | 6.6                                        | 0.3                                        | 9.1                                        | 84.0                                      |
| 7                 | 4.1                                        | 0.5                                        | 9.3                                        | 86.1                                      |
| 8                 | 8.5                                        | 0.4                                        | 9.1                                        | 82.1                                      |
| 9                 | 3.2                                        | 1.6                                        | 9.5                                        | 85.8                                      |
| 10                | 1.9                                        | 0.0                                        | 9.5                                        | 88.6                                      |
| 11                | 4.9                                        | 0.0                                        | 10.2                                       | 84.9                                      |
| 12                | 1.5                                        | 0.0                                        | 6.1                                        | 92.4                                      |
| 13                | 2.8                                        | 0.0                                        | 3.3                                        | 93.9                                      |
| 14                | 1.2                                        | 0.0                                        | 1.8                                        | 97.0                                      |
| 15                | 0.7                                        | 0.7                                        | 11.3                                       | 87.2                                      |
| 17                | 0.0                                        | 0.0                                        | 2.6                                        | 97.4                                      |
| 18                | 0.0                                        | 0.0                                        | 4.3                                        | 95.7                                      |
| 19                | 0.0                                        | 0.0                                        | 12.4                                       | 87.6                                      |
| 20                | 5.4                                        | 0.0                                        | 3.4                                        | 91.3                                      |
| 21                | 0.0                                        | 0.0                                        | 6.8                                        | 93.2                                      |
| 22                | 0.0                                        | 0.0                                        | 0.0                                        | 100.0                                     |
| 23                | 7.0                                        | 0.0                                        | 7.0                                        | 85.9                                      |
| 24                | 2.8                                        | 0.0                                        | 9.9                                        | 87.3                                      |
| 25                | 0.0                                        | 0.0                                        | 0.0                                        | 100.0                                     |
| 26                | 1.4                                        | 0.0                                        | 1.4                                        | 97.1                                      |
| 27                | 0.0                                        | 0.0                                        | 7.9                                        | 92.1                                      |
| 28                | 0.0                                        | 0.0                                        | 0.0                                        | 100.0                                     |
| LGE22             | 0.0                                        | 0.0                                        | 0.0                                        | 100.0                                     |
| Z                 | 34.2                                       | 0.0                                        | 26.7                                       | 39.1                                      |
| Whole genome      | 9.4                                        | 0.7                                        | 13.9                                       | 76.1                                      |

**table S5. Comparison of resolved RAxML phylogenies at variable window sizes.**

| <b>Window Size</b> | <b>Region</b> | <b>HI Resolved Phylogenies (%)</b> | <b>PI Resolved Phylogenies (%)</b> | <b>SI Resolved Phylogenies (%)</b> | <b>Unresolved Phylogenies (%)</b> |
|--------------------|---------------|------------------------------------|------------------------------------|------------------------------------|-----------------------------------|
| 100kb              | Chr. Z        | 34.2                               | 0.0                                | 26.7                               | 39.1                              |
|                    | Whole genome  | 9.4                                | 0.7                                | 13.9                               | 76.1                              |
| 50kb               | Chr. Z        | 34.6                               | 0.4                                | 24.1                               | 40.9                              |
|                    | Whole genome  | 9.9                                | 0.8                                | 12.7                               | 76.6                              |
| 10kb               | Chr. Z        | 31.3                               | 0.6                                | 19.0                               | 49.1                              |
|                    | Whole genome  | 9.4                                | 0.8                                | 10.2                               | 79.6                              |

**table S6. ENSEMBLE gene IDs for genes within top divergence windows.**

| Gene                 | Outlier Type | Human ID        | Chicken ID         | Zebra finch ID      |
|----------------------|--------------|-----------------|--------------------|---------------------|
| ABCC9                | SI           | ENSG00000069431 | ENSGALG00000013244 | NA                  |
| ALDOB                | SI           | ENSG00000136872 | ENSGALG00000015544 | ENSTGUG00000000650  |
| APTX                 | SI           | ENSG00000137074 | ENSGALG00000001954 | ENSTGUG00000001441  |
| ATP9B                | SI           | ENSG00000166377 | ENSGALG00000012656 | ENSTGUG00000006549  |
| CALN1                | SI           | ENSG00000183166 | ENSGALG00000001122 | NA                  |
| CHRNA3               | SI           | ENSG00000080644 | ENSGALG00000003014 | ENSTGUG00000003469  |
| CHRNA5               | SI           | ENSG00000169684 | ENSGALG00000003021 | ENSTGUG00000003451  |
| CHRNB4               | SI           | ENSG00000117971 | ENSGALG00000003005 | NA                  |
| CKMT2                | SI           | ENSG00000131730 | ENSGALG00000015602 | NA                  |
| CMAS                 | SI           | ENSG00000111726 | ENSGALG00000013229 | ENSTGUG00000012063  |
| CORO2A               | SI           | ENSG00000106789 | ENSGALG00000001933 | ENSTGUG00000001408  |
| CRABP1               | SI           | ENSG00000166426 | ENSGALG00000003193 | ENSTGUG00000003323  |
| CTDP1                | SI           | ENSG00000060069 | ENSGALG00000012653 | ENSTGUG00000006649  |
| DNAJA1               | SI           | ENSG00000086061 | ENSGALG00000023066 | ENSTGUG00000001446  |
| DNAJC25              | SI           | ENSG00000059769 | ENSGALG00000015684 | NA                  |
| ECM29<br>(=KIAA0368) | SI           | ENSG00000136813 | ENSGALG00000015689 | ENSTGUG00000001279  |
| EPHB2                | SI           | ENSG00000133216 | ENSGALG00000004741 | ENSTGUG00000017194  |
| ETFA                 | SI           | ENSG00000140374 | ENSGALG00000002925 |                     |
| FAM78B               | SI           | ENSG00000188859 | ENSGALG00000003035 | ENSTGUG00000017258  |
| FASLG                | SI           | ENSG00000117560 | ENSGALG00000003076 | ENSTGUG00000017264  |
| FBXO22               | SI           | ENSG00000167196 | ENSGALG00000028035 | ENSTGUG00000003514  |
| FMO5                 | SI           | ENSG00000131781 | NA                 | NA                  |
| FOCAD                | SI           | ENSG00000188352 | ENSGALG00000015071 | ENSTGUG00000004262  |
| FXN                  | SI           | ENSG00000165060 | ENSGALG00000015108 | ENSTGUG00000004200  |
| GEMIN8               | SI           | ENSG00000046647 | ENSGALG00000016574 |                     |
| GHR                  | SI           | ENSG00000112964 | ENSGALG00000014855 | ENSTGUG00000002265  |
| GLI3                 | SI           | ENSG00000106571 | ENSGALG00000012329 | ENSTGUG00000001834  |
| GNG10                | SI           | ENSG00000242616 | ENSGALG00000015683 | ENSTGUG00000001275  |
| GREM2                | SI           | ENSG00000180875 | ENSGALG00000010773 | ENSTGUG00000010595  |
| HMGCS2               | SI           | ENSG00000134240 | ENSGALG00000002960 | ENSTGUG00000017243  |
| HSDL2                | SI           | ENSG00000119471 | ENSGALG00000015663 | NA                  |
| HYKK                 | SI           | ENSG00000188266 | ENSGALG00000003063 | ENSTGUG00000003420  |
| IKBKAP               | SI           | ENSG00000070061 | ENSGALG00000001947 | ENSTGUG00000001421  |
| INHBA                | SI           | ENSG00000122641 | ENSGALG00000012327 | ENSTGUG00000001843  |
| IREB2                | SI           | ENSG00000136381 | ENSGALG00000003171 | ENSTGUG00000003332  |
| ISL2                 | SI           | ENSG00000159556 | NA                 | NA                  |
| KCNJ8                | SI           | ENSG00000121361 | ENSGALG00000026373 | ENSTGUG00000012087  |
| L3MBTL3              | SI           | ENSG00000198945 | ENSGALG00000014009 | ENSTGUG00000011709  |
| LPPR1<br>(=PLPPR1)   | SI           | ENSG00000148123 | ENSGALG00000015542 | ENSTGUG00000000645  |
| MECR                 | SI           | ENSG00000116353 | ENSGALG00000001426 | ENSTGUG00000000771  |
| N<br>(=NOTCH1)       | SI           | ENSG00000148400 | ENSGALG00000002375 | ENSTGUG00000006073  |
| NFATC1               | SI           | ENSG00000131196 | ENSGALG00000012654 | ENSTGUG00000006621  |
| NOTCH2               | SI           | ENSG00000134250 | ENSGALG00000002922 | ENSTGUG000000017231 |
| NRG1                 | SI           | ENSG00000157168 | ENSGALG00000015422 | ENSTGUG00000000280  |
| NTN3                 | SI           | ENSG00000162068 | ENSGALG00000029072 | ENSTGUG00000003265  |
| PCDH9                | SI           | ENSG00000184226 | ENSGALG00000016908 | ENSTGUG00000012486  |
| PDE4DIP              | SI           | ENSG00000178104 | ENSGALG00000011777 | NA                  |
| PHGDH                | SI           | ENSG00000092621 | ENSGALG00000002988 | NA                  |
| PIP5K1B              | SI           | ENSG00000107242 | ENSGALG00000015107 | ENSTGUG00000004178  |
| PPAPDC2<br>(=PLPP6)  | SI           | ENSG00000205808 | NA                 | NA                  |

|                     |    |                 |                    |                     |
|---------------------|----|-----------------|--------------------|---------------------|
| PRDX6               | SI | ENSG00000117592 | ENSGALG00000003053 | NA                  |
| PRKAB2              | SI | ENSG00000131791 | ENSGALG00000001678 | ENSTGUG000000017249 |
| PSMA4               | SI | ENSG00000041357 | ENSGALG00000003046 | ENSTGUG00000003425  |
| PTBP3               | SI | ENSG00000119314 | ENSGALG00000015669 | ENSTGUG00000001262  |
| PTCH1               | SI | ENSG00000185920 | ENSGALG00000012620 | ENSTGUG00000000532  |
| PTPLAD2<br>(=HACD4) | SI | ENSG00000188921 | ENSGALG00000028142 | NA                  |
| PTPRU               | SI | ENSG00000060656 | ENSGALG00000001443 | ENSTGUG00000000777  |
| RCN2                | SI | ENSG00000117906 | ENSGALG00000002844 | ENSTGUG00000003639  |
| REG4                | SI | ENSG00000134193 | ENSGALG00000002931 | ENSTGUG00000017242  |
| RFK                 | SI | ENSG00000135002 | ENSGALG00000000004 | ENSTGUG00000003505  |
| RGS7                | SI | ENSG00000182901 | ENSGALG00000010772 | ENSTGUG00000010596  |
| RNF20               | SI | ENSG00000155827 | ENSGALG00000015548 | ENSTGUG00000017517  |
| SCAPER              | SI | ENSG00000140386 | ENSGALG00000002883 | ENSTGUG00000003573  |
| SEPP1               | SI | ENSG00000250722 | ENSGALG00000014857 | NA                  |
| SLC10A2             | SI | ENSG00000125255 | ENSGALG00000016858 | ENSTGUG00000010806  |
| SMU1                | SI | ENSG00000122692 | ENSGALG00000002014 | ENSTGUG00000001458  |
| SRSF4               | SI | ENSG00000116350 | ENSGALG00000001411 | ENSTGUG00000000765  |
| SUCO                | SI | ENSG00000094975 | ENSGALG00000003081 | ENSTGUG00000017265  |
| SUSD1               | SI | ENSG00000106868 | ENSGALG00000015677 | ENSTGUG00000001267  |
| TADA1               | SI | ENSG00000152382 | ENSGALG00000003064 | ENSTGUG00000017261  |
| TBC1D2              | SI | ENSG00000095383 | ENSGALG00000001944 | ENSTGUG00000001416  |
| TBC1D24             | SI | ENSG00000162065 | NA                 | NA                  |
| TJP2                | SI | ENSG00000119139 | ENSGALG00000015109 | NA                  |
| TMEM246             | SI | ENSG00000165152 | ENSGALG00000015545 | ENSTGUG00000000659  |
| WBCR17              | SI | ENSG00000185274 | ENSGALG00000001130 | ENSTGUG00000003475  |
| ZCCHC9              | SI | ENSG00000131732 | ENSGALG00000015603 | ENSTGUG00000006994  |
| ACR                 | HI | ENSG00000100312 | ENSGALG00000023986 | NA                  |
| ADORA1              | HI | ENSG00000163485 | ENSGALG00000000168 | ENSTGUG00000001381  |
| AGXT2               | HI | ENSG00000113492 | ENSGALG00000003432 | ENSTGUG00000001974  |
| ANKRD55             | HI | ENSG00000164512 | ENSGALG00000014717 | ENSTGUG00000002579  |
| ANXA10              | HI | ENSG00000109511 | ENSGALG00000009573 | ENSTGUG00000006030  |
| ASXL3               | HI | ENSG00000141431 | ENSGALG00000015196 | ENSTGUG00000010779  |
| ATG7                | HI | ENSG00000197548 | ENSGALG00000004932 | ENSTGUG00000004145  |
| ABCA1               | HI | ENSG00000165029 | ENSGALG00000015433 | ENSTGUG00000000310  |
| BMP15               | HI | ENSG00000130385 | ENSGALG00000004742 | ENSTGUG00000004869  |
| BRD9                | HI | ENSG00000028310 | ENSGALG00000012514 | ENSTGUG00000006776  |
| C16ORF59            | HI | ENSG00000162062 | NA                 | NA                  |
| C6                  | HI | ENSG00000039537 | ENSGALG00000014840 | ENSTGUG00000002207  |
| C7                  | HI | ENSG00000112936 | ENSGALG00000014835 | ENSTGUG00000002197  |
| CA12                | HI | ENSG00000074410 | ENSGALG00000003456 | NA                  |
| CAB39               | HI | ENSG00000135932 | ENSGALG00000027262 | ENSTGUG00000005413  |
| CANT1               | HI | ENSG00000171302 | ENSGALG00000011822 | ENSTGUG00000003205  |
| CCNB3               | HI | ENSG00000147082 | ENSGALG00000025810 | NA                  |
| CLDN4               | HI | ENSG00000189143 | ENSGALG00000027569 | ENSTGUG00000003355  |
| CLIC2               | HI | ENSG00000155962 | ENSGALG00000004730 | ENSTGUG00000004925  |
| CMTM3               | HI | ENSG00000140931 | ENSGALG00000000424 | ENSTGUG00000009792  |
| COL4A6              | HI | ENSG00000197565 | ENSGALG00000008266 | ENSTGUG00000004100  |
| COPB2               | HI | ENSG00000184432 | ENSGALG00000005357 | ENSTGUG00000005180  |
| CRHR1               | HI | ENSG00000263715 | ENSGALG00000000371 | NA                  |
| CRIP1               | HI | ENSG00000213145 | NA                 | NA                  |
| CSRP1               | HI | ENSG00000159176 | ENSGALG00000000318 | ENSTGUG00000001313  |
| CYTH1               | HI | ENSG00000108669 | ENSGALG00000007093 | NA                  |
| CDC42               | HI | ENSG00000070831 | ENSGALG00000004796 | ENSTGUG00000017253  |
| CIB2                | HI | ENSG00000136425 | ENSGALG00000026674 | ENSTGUG00000003241  |
| CKLF                | HI | ENSG00000217555 | ENSGALG00000005254 | NA                  |
| CLDN3               | HI | ENSG00000165215 | ENSGALG00000022557 | NA                  |
| CRIP2               | HI | ENSG00000182809 | ENSGALG00000026471 | ENSTGUG00000017183  |

|           |    |                 |                     |                    |
|-----------|----|-----------------|---------------------|--------------------|
| DAPK2     | HI | ENSG0000035664  | ENSGALG0000003336   | ENSTGUG0000003221  |
| DDR2      | HI | ENSG00000162733 | NA                  | ENSTGUG00000017090 |
| DGKD      | HI | ENSG00000077044 | ENSGALG00000001730  | ENSTGUG00000007464 |
| DNAJC21   | HI | ENSG00000168724 | ENSGALG00000003387  | ENSTGUG00000001971 |
| DENND2D   | HI | ENSG00000162777 | ENSGALG00000000154  | ENSTGUG00000001388 |
| DNAH17    | HI | ENSG00000187775 | ENSGALG00000007106  | NA                 |
| EIF3E     | HI | ENSG00000104408 | ENSGALG00000016093  | NA                 |
| EMC2      | HI | ENSG00000104412 | ENSGALG00000016097  | NA                 |
| ENGASE    | HI | ENSG00000167280 | ENSGALG00000011816  | ENSTGUG00000003184 |
| ERBB2IP   | HI | NA              | ENSGALG00000014773  | NA                 |
| EVA1C     | HI | ENSG00000166979 | ENSGALG00000015888  | ENSTGUG00000013443 |
| FBXL22    | HI | ENSG00000197361 | ENSGALG00000003401  | ENSTGUG00000003187 |
| FCGBP     | HI | ENSG00000275395 | ENSGALG00000007208  | NA                 |
| FGD5      | HI | ENSG00000154783 | ENSGALG00000008546  | ENSTGUG00000010607 |
| FOXL2     | HI | ENSG00000183770 | ENSGALG00000021009  | ENSTGUG00000005285 |
| GABRP     | HI | ENSG00000094755 | ENSGALG00000002152  | ENSTGUG00000014916 |
| GNAI1     | HI | ENSG00000127955 | ENSGALG00000008382  | ENSTGUG00000002652 |
| GNPDA2    | HI | ENSG00000163281 | ENSGALG00000014210  | ENSTGUG00000008441 |
| GPR35     | HI | ENSG00000178623 | ENSGALG00000005546  | NA                 |
| GUF1      | HI | ENSG00000151806 | ENSGALG00000014217  | ENSTGUG00000008453 |
| GOLGA4    | HI | ENSG00000144674 | ENSGALG00000012258  | ENSTGUG00000001889 |
| GPR55     | HI | ENSG00000135898 | ENSGALG00000005544  | ENSTGUG00000005448 |
| HDAC11    | HI | ENSG00000163517 | ENSGALG00000005092  | ENSTGUG00000003803 |
| HERC1     | HI | ENSG00000103657 | ENSGALG00000003381  | ENSTGUG00000003191 |
| HRH1      | HI | ENSG00000196639 | ENSGALG00000004930  | ENSTGUG00000004180 |
| HTATIP2   | HI | ENSG00000109854 | ENSGALG00000002581  | ENSTGUG00000017027 |
| HDAC8     | HI | ENSG00000147099 | ENSGALG00000004825  | ENSTGUG00000004801 |
| HSD17B7   | HI | ENSG00000132196 | ENSGALG00000002681  | ENSTGUG00000017081 |
| IGFBP1    | HI | ENSG00000146678 | ENSGALG00000012437  | ENSTGUG00000007176 |
| IL6ST     | HI | ENSG00000134352 | ENSGALG00000014716  | ENSTGUG00000002569 |
| ITM2B     | HI | ENSG00000136156 | ENSGALG00000016996  | ENSTGUG00000012223 |
| IGFN1     | HI | ENSG00000163395 | ENSGALG00000000295  | NA                 |
| ITM2C     | HI | ENSG00000135916 | ENSGALG00000005539  | ENSTGUG00000005426 |
| JAG1      | HI | ENSG00000101384 | ENSGALG00000009020  | ENSTGUG00000006079 |
| KCNMB1    | HI | ENSG00000145936 | ENSGALG00000002118  | ENSTGUG00000014898 |
| KLHL12    | HI | ENSG00000117153 | ENSGALG00000000518  | ENSTGUG00000001234 |
| KAZALD1   | HI | ENSG00000107821 | ENSGALG00000007837  | ENSTGUG00000010037 |
| KCNIP1    | HI | ENSG00000182132 | ENSGALG00000002132  | ENSTGUG00000014900 |
| KCNV2     | HI | ENSG00000168263 | ENSGALG00000010173  | ENSTGUG00000005377 |
| LOX       | HI | ENSG00000113083 | ENSGALG000000028063 | ENSTGUG00000001145 |
| LPL       | HI | ENSG00000175445 | ENSGALG00000015425  | ENSTGUG00000000287 |
| MCAT      | HI | ENSG00000100294 | ENSGALG00000014165  | ENSTGUG00000012035 |
| MGAT4C    | HI | ENSG00000182050 | ENSGALG000000028360 | ENSTGUG00000007933 |
| MRPS25    | HI | ENSG00000131368 | ENSGALG00000008506  | ENSTGUG00000010579 |
| MYBPH     | HI | ENSG00000133055 | ENSGALG00000000164  | NA                 |
| MYOG      | HI | ENSG00000122180 | ENSGALG00000000172  | ENSTGUG00000001380 |
| MRPS22    | HI | ENSG00000175110 | ENSGALG00000005367  | ENSTGUG00000005274 |
| MTA1      | HI | ENSG00000182979 | ENSGALG00000002803  | ENSTGUG00000017196 |
| NIPSNAP3A | HI | ENSG00000136783 | NA                  | NA                 |
| NMNAT1    | HI | ENSG00000173614 | ENSGALG000000026695 | NA                 |
| NPM1      | HI | ENSG00000181163 | ENSGALG00000002197  | ENSTGUG00000014970 |
| NR2C2     | HI | ENSG00000177463 | ENSGALG00000008519  | ENSTGUG00000010590 |
| NTRK2     | HI | ENSG00000148053 | ENSGALG00000012594  | ENSTGUG00000003077 |
| NUP155    | HI | ENSG00000113569 | ENSGALG00000003688  | ENSTGUG00000002069 |
| NOS1AP    | HI | ENSG00000198929 | NA                  | NA                 |
| OLFML2B   | HI | ENSG00000162745 | ENSGALG00000002667  | ENSTGUG00000017073 |
| PACS2     | HI | ENSG00000179364 | ENSGALG00000002894  | ENSTGUG00000017216 |
| PCDH17    | HI | ENSG00000118946 | ENSGALG00000016941  | ENSTGUG00000012457 |

|                                                                     |    |                 |                    |                    |
|---------------------------------------------------------------------|----|-----------------|--------------------|--------------------|
| PER2                                                                | HI | ENSG00000132326 | ENSGALG00000005521 | NA                 |
| PGS1                                                                | HI | ENSG00000087157 | ENSGALG00000007181 | ENSTGUG00000003319 |
| PHKA1                                                               | HI | ENSG00000067177 | ENSGALG00000004801 | ENSTGUG00000004827 |
| PHLDA3                                                              | HI | ENSG00000174307 | ENSGALG00000019802 | NA                 |
| PIK3CB                                                              | HI | ENSG00000051382 | ENSGALG00000005505 | NA                 |
| PRKAA1                                                              | HI | ENSG00000132356 | ENSGALG00000014832 | ENSTGUG00000002173 |
| PRLR                                                                | HI | ENSG00000113494 | ENSGALG00000003446 | ENSTGUG00000001979 |
| PSD3                                                                | HI | ENSG00000156011 | ENSGALG00000015428 | NA                 |
| PKP1                                                                | HI | ENSG00000081277 | ENSGALG00000000299 | ENSTGUG00000001339 |
| PPFIA4                                                              | HI | ENSG00000143847 | ENSGALG00000000217 | ENSTGUG00000001363 |
| PUMILIO<br>DOMAIN-<br>CONTAININ<br>G PROTEIN<br>KIAA0020<br>HOMOLOG | HI | NA              | NA                 | NA                 |
| RABIF                                                               | HI | ENSG00000183155 | ENSGALG00000000436 | NA                 |
| RAPGEF6                                                             | HI | ENSG00000158987 | NA                 | NA                 |
| RBSN                                                                | HI | ENSG00000131381 | ENSGALG00000008500 | ENSTGUG00000010568 |
| RGS13                                                               | HI | ENSG00000127074 | ENSGALG00000026810 | NA                 |
| RGS18                                                               | HI | ENSG00000150681 | ENSGALG00000021143 | NA                 |
| RGS2                                                                | HI | ENSG00000116741 | ENSGALG00000002540 | ENSTGUG00000016954 |
| RGS21                                                               | HI | ENSG00000253148 | ENSGALG00000023897 | NA                 |
| RGS4                                                                | HI | ENSG00000117152 | ENSGALG00000002564 | ENSTGUG00000016967 |
| RGS5                                                                | HI | ENSG00000143248 | ENSGALG00000026572 | ENSTGUG00000016990 |
| RPGRIP1L                                                            | HI | ENSG00000103494 | ENSGALG00000003602 | NA                 |
| RPS4<br>(=RPS4X)                                                    | HI | ENSG00000198034 | ENSGALG00000004831 | NA                 |
| RBP1                                                                | HI | ENSG00000114115 | ENSGALG00000027820 | ENSTGUG00000005153 |
| RBP2                                                                | HI | ENSG00000114113 | ENSGALG00000005327 | ENSTGUG00000005160 |
| RGS1                                                                | HI | ENSG00000090104 | ENSGALG00000002549 | NA                 |
| RPL37                                                               | HI | ENSG00000145592 | ENSGALG00000014833 | ENSTGUG00000002186 |
| SCUBE1                                                              | HI | ENSG00000159307 | ENSGALG00000014178 | ENSTGUG00000012016 |
| SELP                                                                | HI | ENSG00000174175 | ENSGALG00000002643 | ENSTGUG00000017040 |
| SFSWAP                                                              | HI | ENSG00000061936 | ENSGALG00000002487 | ENSTGUG00000004623 |
| SLC9A3                                                              | HI | ENSG00000066230 | ENSGALG00000012517 | ENSTGUG00000006804 |
| SNCAIP                                                              | HI | ENSG00000064692 | ENSGALG00000005330 | ENSTGUG00000001137 |
| SPP2                                                                | HI | ENSG00000072080 | ENSGALG00000004129 | ENSTGUG00000003884 |
| SREK1                                                               | HI | ENSG00000153914 | ENSGALG00000014775 | ENSTGUG00000002935 |
| SRFBP1                                                              | HI | ENSG00000151304 | ENSGALG00000005316 | NA                 |
| SH3BP4                                                              | HI | ENSG00000130147 | ENSGALG00000004140 | ENSTGUG00000003098 |
| SHROOM4                                                             | HI | ENSG00000158352 | NA                 | NA                 |
| SLC12A7                                                             | HI | ENSG00000113504 | ENSGALG00000012497 | ENSTGUG00000006931 |
| SYNAPTO-<br>BREVIN                                                  | HI | NA              | NA                 | NA                 |
| TBC1D2B                                                             | HI | ENSG00000167202 | ENSGALG00000003322 | ENSTGUG00000003235 |
| TIMP2                                                               | HI | ENSG00000035862 | ENSGALG00000027070 |                    |
| TK2                                                                 | HI | ENSG00000166548 |                    |                    |
| TLX3                                                                | HI | ENSG00000164438 | ENSGALG00000002191 | ENSTGUG00000014966 |
| TMEM121                                                             | HI | ENSG00000184986 | ENSGALG00000002756 | ENSTGUG00000017172 |
| TMEM183<br>(=TMEM183<br>A)                                          | HI | ENSG00000163444 | NA                 | NA                 |
| TNNT2                                                               | HI | ENSG00000118194 | ENSGALG00000000302 | ENSTGUG00000001330 |
| TRH                                                                 | HI | ENSG00000170893 | ENSGALG00000008490 |                    |
| TRIP13                                                              | HI | ENSG00000071539 | ENSGALG00000012508 | ENSTGUG00000006756 |
| TRPM8                                                               | HI | ENSG00000144481 | ENSGALG00000004116 | ENSTGUG00000003521 |
| TSPO                                                                | HI | ENSG00000100300 | ENSGALG00000014166 | ENSTGUG00000012033 |
| TTLL1                                                               | HI | ENSG00000100271 | ENSGALG00000014163 | ENSTGUG00000012037 |



|                                         |    |                 |                    |                    |
|-----------------------------------------|----|-----------------|--------------------|--------------------|
| TGFBR1                                  | HI | ENSG00000106799 | ENSGALG00000012617 | ENSTGUG00000006726 |
| TMEM9                                   | HI | ENSG00000116857 | ENSGALG00000000226 | ENSTGUG00000001345 |
| TNNI1                                   | HI | ENSG00000159173 | ENSGALG00000000313 | ENSTGUG00000001319 |
| TTL12                                   | HI | ENSG00000100304 | ENSGALG00000014167 | ENSTGUG00000012025 |
| UAP1                                    | HI | ENSG00000117143 | ENSGALG00000002725 | ENSTGUG00000017130 |
| UGT1A1                                  | HI | ENSG00000241635 | NA                 | ENSTGUG00000003102 |
| UHK1                                    | HI | ENSG00000152332 | ENSGALG00000002734 | ENSTGUG00000017148 |
| UNC13A                                  | HI | ENSG00000130477 | ENSGALG00000026462 | NA                 |
| UNCHARACTERIZED PROTEIN C1ORF50 HOMOLOG | HI | ENSG00000164008 | ENSGALG00000004800 | ENSTGUG00000017254 |
| USP3                                    | HI | ENSG00000140455 | ENSGALG00000003427 | ENSTGUG00000003160 |
| USP36                                   | HI | ENSG00000055483 | ENSGALG00000028462 | NA                 |
| VGLL4                                   | HI | ENSG00000144560 | ENSGALG00000004937 | ENSTGUG00000004136 |
| WBSR27                                  | HI | ENSG00000165171 | ENSGALG00000026762 | NA                 |
| WDR72                                   | HI | ENSG00000166415 | ENSGALG00000004545 | ENSTGUG00000006614 |
| WNT4                                    | HI | ENSG00000162552 | ENSGALG00000004790 | ENSTGUG00000017251 |
| ZNF474                                  | HI | ENSG00000164185 | NA                 | NA                 |
| ABHD11                                  | HI | ENSG00000106077 | ENSGALG00000001056 | NA                 |
| GAG polyprotein                         | HI | NA              | NA                 | NA                 |
| MTMR4                                   | HI | ENSG00000108389 | ENSGALG00000001042 | ENSTGUG00000003314 |
| TAMM41                                  | HI | ENSG00000144559 | ENSGALG00000004940 | ENSTGUG00000004121 |
|                                         |    |                 |                    |                    |
| A2M                                     | PI | ENSG00000175899 | ENSGALG00000022964 | NA                 |
| A2ML1                                   | PI | ENSG00000166535 | NA                 | NA                 |
| ALDH1A1                                 | PI | ENSG00000165092 | ENSGALG00000015147 | ENSTGUG00000000800 |
| AOPEP=(C9orf3)                          | PI | ENSG00000148120 | ENSGALG00000012615 | ENSTGUG00000000565 |
| APC                                     | PI | ENSG00000134982 | NA                 |                    |
| APOBEC1                                 | PI | ENSG00000111701 | NA                 |                    |
| ASUN                                    | PI | ENSG00000064102 | ENSGALG00000014083 | ENSTGUG00000012188 |
| ACER3                                   | PI | ENSG00000078124 | ENSGALG00000000755 | ENSTGUG00000013058 |
| AIDA                                    | PI | ENSG00000186063 | ENSGALG00000009426 | NA                 |
| AIFM1                                   | PI | ENSG00000156709 | ENSGALG00000004003 | NA                 |
| BROX                                    | PI | ENSG00000162819 | ENSGALG00000009413 | NA                 |
| BCORL1                                  | PI | ENSG00000085185 | ENSGALG00000003976 | NA                 |
| BHLHE41                                 | PI | ENSG00000123095 | NA                 | NA                 |
| BNC2                                    | PI | ENSG00000173068 | ENSGALG00000015101 | ENSTGUG00000004482 |
| CEP120                                  | PI | ENSG00000168944 | ENSGALG00000005368 | ENSTGUG00000001104 |
| CLCN1                                   | PI | ENSG00000188037 | ENSGALG00000014695 | ENSTGUG00000013222 |
| CLCN5                                   | PI | ENSG00000171365 | ENSGALG00000007234 | ENSTGUG00000005324 |
| CP37                                    | PI | NA              | NA                 | NA                 |
| CAPN5                                   | PI | ENSG00000149260 | ENSGALG00000000750 | ENSTGUG00000013052 |
| CLEC4A                                  | PI | ENSG00000111729 | NA                 | NA                 |
| DCP2                                    | PI | ENSG00000172795 | ENSGALG00000000215 | ENSTGUG00000001035 |
| DISP1                                   | PI | ENSG00000154309 | ENSGALG00000009404 | ENSTGUG00000002654 |
| DPT                                     | PI | ENSG00000143196 | ENSGALG00000019229 | ENSTGUG00000013432 |
| DUSP10                                  | PI | ENSG00000143507 | ENSGALG00000009450 | ENSTGUG00000002705 |
| ENOX2                                   | PI | ENSG00000165675 | ENSGALG00000004079 | ENSTGUG00000005267 |
| EPHA1                                   | PI | ENSG00000146904 | ENSGALG00000014687 | ENSTGUG00000013242 |
| FAM115C (=TCAF2)                        | PI | ENSG00000170379 | NA                 | NA                 |
| FGFR1OP2                                | PI | ENSG00000111790 | ENSGALG00000014084 | NA                 |
| FKBP4                                   | PI | ENSG00000004478 | ENSGALG00000014331 | ENSTGUG00000013147 |
| FAM131B                                 | PI | ENSG00000159784 | ENSGALG00000014689 | ENSTGUG00000013232 |
| FMO1                                    | PI | ENSG00000010932 | NA                 | NA                 |

|                    |    |                 |                    |                    |
|--------------------|----|-----------------|--------------------|--------------------|
| FOXJ2              | PI | ENSG00000065970 | ENSGALG00000014329 | ENSTGUG00000013133 |
| FOXM1              | PI | ENSG00000111206 | ENSGALG00000013420 | NA                 |
| GPR119             | PI | ENSG00000147262 | ENSGALG00000004069 | ENSTGUG00000018290 |
| GORAB              | PI | ENSG00000120370 | ENSGALG00000003329 | NA                 |
| ITFG2              | PI | ENSG00000111203 | ENSGALG00000014335 | ENSTGUG00000013150 |
| ITPR2              | PI | ENSG00000123104 | ENSGALG00000014071 | ENSTGUG00000012196 |
| KDM4C              | PI | ENSG00000107077 | NA                 | NA                 |
| KLRG1              | PI | ENSG00000139187 | NA                 | NA                 |
| KCNN2              | PI | ENSG00000080709 | ENSGALG00000002539 | ENSTGUG00000001344 |
| LRRC32             | PI | ENSG00000137507 | ENSGALG00000000818 | NA                 |
| M6PR               | PI | ENSG00000003056 | ENSGALG00000014256 | ENSTGUG00000013099 |
| MARS2              | PI | ENSG00000247626 | ENSGALG00000004019 | ENSTGUG00000005225 |
| MCC                | PI | ENSG00000171444 | ENSGALG00000000208 | ENSTGUG00000001036 |
| MIA3               | PI | ENSG00000154305 | ENSGALG00000009434 | NA                 |
| MUG2               | PI | NA              | NA                 | NA                 |
| NDST4              | PI | ENSG00000138653 | ENSGALG00000012015 | NA                 |
| NECAP1             | PI | ENSG00000089818 | ENSGALG00000014330 | ENSTGUG00000013138 |
| OR10K2             | PI | ENSG00000180708 | NA                 | NA                 |
| OVO-STATIN (=OVST) | PI | NA              | ENSGALG00000022962 | NA                 |
| PARP11             | PI | ENSG00000111224 | ENSGALG00000014347 | ENSTGUG00000013169 |
| PDE10A             | PI | ENSG00000112541 | ENSGALG00000011537 | ENSTGUG00000009390 |
| PHC1               | PI | ENSG00000111752 | ENSGALG00000014263 | NA                 |
| PRRX1              | PI | ENSG00000116132 | ENSGALG00000003324 | NA                 |
| PRMT8              | PI | ENSG00000111218 | ENSGALG00000013272 | ENSTGUG00000013173 |
| PTPRD              | PI | ENSG00000153707 | ENSGALG00000015058 | ENSTGUG00000004740 |
| REEP5              | PI | ENSG00000129625 | ENSGALG00000023157 | ENSTGUG00000001029 |
| RIMKLB             | PI | ENSG00000166532 | ENSGALG00000014274 | ENSTGUG00000013112 |
| RORB               | PI | ENSG00000198963 | ENSGALG00000015150 | ENSTGUG00000000785 |
| RAB33A             | PI | ENSG00000134594 | ENSGALG00000024049 | ENSTGUG00000005228 |
| RBMX2              | PI | ENSG00000134597 | ENSGALG00000004025 | NA                 |
| SECISBP2           | PI | ENSG00000187742 | ENSGALG00000010694 | NA                 |
| SLC25A14           | PI | ENSG00000102078 | ENSGALG00000004063 | NA                 |
| SLC2A3             | PI | ENSG00000059804 | ENSGALG00000014324 | NA                 |
| SRP19              | PI | ENSG00000153037 | NA                 | NA                 |
| SSPN               | PI | ENSG00000123096 | ENSGALG00000014042 | ENSTGUG00000012229 |
| SUSD4              | PI | ENSG00000143502 | ENSGALG00000009388 | ENSTGUG00000002646 |
| SHC3               | PI | ENSG00000148082 | ENSGALG00000010688 | ENSTGUG00000000448 |
| T                  | PI | ENSG00000164458 | ENSGALG00000011489 | ENSTGUG00000009448 |
| TAF1A              | PI | ENSG00000143498 | ENSGALG00000009441 | ENSTGUG00000002690 |
| TEAD4              | PI | ENSG00000197905 | ENSGALG00000014342 | ENSTGUG00000013161 |
| TMC1               | PI | ENSG00000165091 | ENSGALG00000015145 | ENSTGUG00000000808 |
| TMEM2              | PI | ENSG00000135048 | ENSGALG00000015138 | ENSTGUG00000000841 |
| TMLHE              | PI | ENSG00000185973 | ENSGALG00000007443 | ENSTGUG00000005397 |
| TRPM6              | PI | ENSG00000119121 | ENSGALG00000015154 | ENSTGUG00000000774 |
| TSPAN9             | PI | ENSG00000011105 | ENSGALG00000014346 | ENSTGUG00000013167 |
| TULP3              | PI | ENSG00000078246 | ENSGALG00000013424 | ENSTGUG00000013157 |
| UGT8               | PI | ENSG00000174607 | ENSGALG00000012018 | ENSTGUG00000001840 |
| XCL1               | PI | ENSG00000143184 | ENSGALG00000015235 | NA                 |
| ZCCHC6             | PI | ENSG00000083223 | ENSGALG00000012607 | ENSTGUG00000000624 |
| ZFAND5             | PI | ENSG00000107372 | ENSGALG00000015144 | ENSTGUG00000000824 |
| ZYX                | PI | ENSG00000159840 | ENSGALG00000014688 | ENSTGUG00000013238 |
| C3AR1              | PI | ENSG00000171860 | ENSGALG00000013218 | NA                 |

**table S7. Significantly enriched GO pathways from ClueGo analysis in HI outlier windows.**

| GO ID      | GO Term                                                                     | Term Corrected P Value | Group Corrected P Value | Genes Associated                                                                                                             |
|------------|-----------------------------------------------------------------------------|------------------------|-------------------------|------------------------------------------------------------------------------------------------------------------------------|
| GO:0003015 | heart process                                                               | 0.04151716             | Group2=1.475865E-5      | ADORA1, CDC42, CLIC2, KCNIP1, NOS1AP, NUP155, RGS2, TNNI1, TNNT2                                                             |
| GO:0006865 | amino acid transport                                                        | 0.0354880              | Group0=9.09950E-4       | ADORA1, NTRK2, PER2, PPFIA4, SH3BP4, TRH, XK                                                                                 |
| GO:0006937 | regulation of muscle contraction                                            | 0.02525859             | Group2=1.475865E-5      | ADORA1, CLIC2, MYBPH, NOS1AP, RGS2, TNNI1, TNNT2                                                                             |
| GO:0006941 | striated muscle contraction                                                 | 0.00531038             | Group2=1.475865E-5      | ADORA1, CLIC2, MYBPH, NOS1AP, NUP155, RGS2, TNNI1, TNNT2                                                                     |
| GO:0006942 | regulation of striated muscle contraction                                   | 0.00536288             | Group2=1.475865E-5      | ADORA1, CLIC2, MYBPH, NOS1AP, RGS2, TNNI1                                                                                    |
| GO:0008277 | regulation of G-protein coupled receptor protein signaling pathway          | 0.01400887             | Group1=6.75126E-4       | RGS1, RGS13, RGS18, RGS2, RGS4, RGS5, RPGRIP1L                                                                               |
| GO:0010506 | regulation of autophagy                                                     | 0.0329784              | Group3=0.00123669       | ATG7, DAPK2, HERC1, PIK3CB, PRKAA1, SH3BP4, TSPO, USP36                                                                      |
| GO:0043087 | regulation of GTPase activity                                               | 2.769808E-4            | Group4=1.55607E-5       | CYTH1, DENND2D, FGD5, HERC1, NTRK2, PSD3, RABIF, RAPGEF6, RGS1, RGS13, RGS18, RGS2, RGS21, RGS4, RGS5, SH3BP4, TBC1D2B, WNT4 |
| GO:0043502 | regulation of muscle adaptation                                             | 0.025065               | Group2=1.475865E-5      | IL6ST, MTMR4, MYOG, RGS2, TNNI1                                                                                              |
| GO:0045727 | positive regulation of translation                                          | 0.04927559             | Group5=0.04927559       | NPM1, RPS4X, UHMK1                                                                                                           |
| GO:0045744 | negative regulation of G-protein coupled receptor protein signaling pathway | 0.003844289            | Group1=6.75126E-4       | RGS13, RGS18, RGS2, RGS4, RPGRIP1L                                                                                           |
| GO:0060047 | heart contraction                                                           | 0.0398800              | Group2=1.475865E-5      | ADORA1, CDC42, CLIC2, KCNIP1, NOS1AP, NUP155, RGS2, TNNI1, TNNT2                                                             |
| GO:0060048 | cardiac muscle contraction                                                  | 0.006473059            | Group2=1.475865E-5      | ADORA1, CLIC2, NOS1AP, NUP155, RGS2, TNNI1, TNNT2                                                                            |
| GO:0090257 | regulation of muscle system process                                         | 8.31039E-4             | Group2=1.475865E-5      | ADORA1, CLIC2, IL6ST, MTMR4, MYBPH, MYOG, NOS1AP, RGS2, TNNI1, TNNT2                                                         |
| GO:1903522 | regulation of blood circulation                                             | 0.0352360              | Group2=1.475865E-5      | ADORA1, CLIC2, CSRP1, HRH1, KCNIP1, NOS1AP, NUP155, PER2, RGS2, TNNT2                                                        |

**table S8. Significantly enriched GO pathways from ClueGo analysis in SI outlier windows.**

| GO ID      | GO Term                                                | Corrected Term PValue | Corrected Group PValue                    | Associated Genes Found              |
|------------|--------------------------------------------------------|-----------------------|-------------------------------------------|-------------------------------------|
| GO:0001708 | cell fate specification                                | 0.01439245            | Group1=1.107587E-4,<br>Group4=0.00215771  | GLI3, ISL2, NOTCH1,<br>PTCH1        |
| GO:0007271 | synaptic transmission,<br>cholinergic                  | 0.01822650            | Group5=0.0354636                          | CHRNA3, CHRNA5,<br>CHRN4            |
| GO:0007274 | neuromuscular<br>synaptic transmission                 | 0.00632436            | Group5=0.0354636                          | CHRNA3, CHRNA5,<br>CHRN4            |
| GO:0016202 | regulation of striated<br>muscle tissue<br>development | 0.01907224            | Group1=1.107587E-4                        | CTDP1, FBXO22,<br>NOTCH1, NRG1      |
| GO:0016525 | negative regulation of<br>angiogenesis                 | 0.03022749            | Group1=1.107587E-4                        | FASLG, NOTCH1,<br>NRG1              |
| GO:0021510 | spinal cord<br>development                             | 0.003122994           | Group1=1.107587E-4,<br>Group4=0.00215771  | GLI3, ISL2, NOTCH1,<br>PHGDH, PTCH1 |
| GO:0021515 | cell differentiation in<br>spinal cord                 | 0.002658011           | Group1=1.107587E-4,<br>Group4=0.00215771  | GLI3, ISL2, NOTCH1,<br>PTCH1        |
| GO:0021517 | ventral spinal cord<br>development                     | 0.0205499             | Group1=1.107587E-4,<br>Group4=0.00215771  | GLI3, ISL2, PTCH1                   |
| GO:0021522 | spinal cord motor<br>neuron differentiation            | 0.01195684            | Group1=1.107587E-4,<br>Group4=0.00215771  | GLI3, ISL2, PTCH1                   |
| GO:0030510 | regulation of BMP<br>signaling pathway                 | 0.02574682            | Group7=0.01716454                         | GREM2, NOTCH1,<br>NOTCH2            |
| GO:0034101 | erythrocyte<br>homeostasis                             | 0.02056678            | Group0=0.005412310                        | INHBA, IREB2,<br>L3MBTL3, PTBP3     |
| GO:0035094 | response to nicotine                                   | 0.02776161            | Group5=0.035463                           | CHRNA3, CHRNA5,<br>CHRN4            |
| GO:0035095 | behavioral response<br>to nicotine                     | 1.152215E-4           | Group5=0.0354636                          | CHRNA3, CHRNA5,<br>CHRN4            |
| GO:0040014 | regulation of<br>multicellular<br>organism growth      | 0.0290452             | Group2=0.001484056                        | FXN, GHR, PTCH1                     |
| GO:0045667 | regulation of<br>osteoblast<br>differentiation         | 0.02217046            | Group1=1.107587E-4,<br>Group4=0.00215771  | GLI3, NOTCH1,<br>PTCH1, SUCO        |
| GO:0045682 | regulation of<br>epidermis<br>development              | 0.02951283            | Group4=0.00215771                         | INHBA, NOTCH1,<br>PTCH1             |
| GO:0046620 | regulation of organ<br>growth                          | 0.01157895            | Group1=1.107587E-4,<br>Group2=0.001484056 | CTDP1, FXN, NOTCH1,<br>NRG1         |
| GO:0048521 | negative regulation of<br>behavior                     | 0.0311752             | Group1=1.107587E-4,<br>Group4=0.00215771  | NOTCH1, NRG1,<br>PTPRU              |
| GO:0048634 | regulation of muscle<br>organ development              | 0.01865057            | Group1=1.107587E-4                        | CTDP1, FBXO22,<br>NOTCH1, NRG1      |
| GO:0048640 | negative regulation of<br>developmental<br>growth      | 0.01355532            | Group1=1.107587E-4,<br>Group2=0.001484056 | CTDP1, FXN, PTCH1                   |
| GO:0048663 | neuron fate<br>commitment                              | 0.00733350            | Group1=1.107587E-4,<br>Group4=0.00215771  | GLI3, ISL2, NOTCH1,<br>NRG1         |
| GO:0048709 | oligodendrocyte<br>differentiation                     | 0.0244387             | Group1=1.107587E-4,<br>Group4=0.00215771  | GLI3, NOTCH1, NRG1                  |
| GO:0050684 | regulation of mRNA<br>processing                       | 0.006968076           | Group6=0.015522                           | PTBP3, RNF20, SRSF4                 |
| GO:0050686 | negative regulation of<br>mRNA processing              | 0.0079974             | Group6=0.015522                           | PTBP3, RNF20, SRSF4                 |
| GO:0050922 | negative regulation of                                 | 0.02129803            | Group1=1.107587E-4,                       | NOTCH1, NRG1,                       |

|            |                                                     |             |                                       |                                   |
|------------|-----------------------------------------------------|-------------|---------------------------------------|-----------------------------------|
|            | chemotaxis                                          |             | Group4=0.00215771                     | PTPRU                             |
| GO:0051147 | regulation of muscle cell differentiation           | 0.01205801  | Group1=1.107587E-4                    | CTDP1, FBXO22, NOTCH1, NRG1, NTN3 |
| GO:0051153 | regulation of striated muscle cell differentiation  | 0.0122296   | Group1=1.107587E-4                    | CTDP1, FBXO22, NOTCH1, NRG1       |
| GO:0055017 | cardiac muscle tissue growth                        | 0.0269513   | Group1=1.107587E-4                    | CTDP1, NOTCH1, NRG1               |
| GO:0055021 | regulation of cardiac muscle tissue growth          | 0.0145185   | Group1=1.107587E-4                    | CTDP1, NOTCH1, NRG1               |
| GO:0055024 | regulation of cardiac muscle tissue development     | 0.02176260  | Group1=1.107587E-4                    | CTDP1, NOTCH1, NRG1               |
| GO:0060021 | palate development                                  | 0.02017733  | Group3=0.01513299                     | EPHB2, GLI3, INHBA                |
| GO:0060419 | heart growth                                        | 0.03176145  | Group1=1.107587E-4                    | CTDP1, NOTCH1, NRG1               |
| GO:0060420 | regulation of heart growth                          | 0.0189312   | Group1=1.107587E-4                    | CTDP1, NOTCH1, NRG1               |
| GO:0061005 | cell differentiation involved in kidney development | 0.001643586 | Group1=1.107587E-4, Group4=0.00215771 | GLI3, NOTCH1, PTCH1, PTPRU        |
| GO:0072009 | nephron epithelium development                      | 0.02142071  | Group1=1.107587E-4, Group4=0.00215771 | GLI3, NOTCH1, PTCH1, PTPRU        |
| GO:0099565 | chemical synaptic transmission, postsynaptic        | 0.01921880  | Group5=0.0354636                      | CHRNA3, CHRNA5, CHRNB4            |
| GO:1901343 | negative regulation of vasculature development      | 0.02574682  | Group1=1.107587E-4                    | FASLG, NOTCH1, NRG1               |
| GO:1901861 | regulation of muscle tissue development             | 0.01865057  | Group1=1.107587E-4                    | CTDP1, FBXO22, NOTCH1, NRG1       |
| GO:1903312 | negative regulation of mRNA metabolic process       | 0.01195684  | Group6=0.015522                       | PTBP3, RNF20, SRSF4               |
| GO:2000181 | negative regulation of blood vessel morphogenesis   | 0.0299293   | Group1=1.107587E-4                    | FASLG, NOTCH1, NRG1               |

**table S9. Significantly enriched GO pathways from ClueGo analysis in PI outlier windows.**

| GO ID      | GO Term                                                                  | Corrected Term PValue | Corrected Group PValue | Associated Genes Found   |
|------------|--------------------------------------------------------------------------|-----------------------|------------------------|--------------------------|
| GO:0002698 | negative regulation of immune effector process                           | 0.006649979           | Group1=0.00816441      | A2M, DUSP10, SUSP4, XCL1 |
| GO:0008589 | regulation of smoothened signaling pathway                               | 0.0082550             | Group0=0.00270858      | DISP1, PRRX1, TULP3      |
| GO:0009953 | dorsal/ventral pattern formation                                         | 0.006972630           | Group0=0.002708588     | AIDA, APC, DISP1, TULP3  |
| GO:0032873 | negative regulation of stress-activated MAPK cascade                     | 0.00546576            | Group2=0.002732883     | AIDA, DUSP10, FOXM1      |
| GO:0045824 | negative regulation of innate immune response                            | 0.00512626            | Group1=0.00816441      | A2M, DUSP10, SUSP4       |
| GO:0050777 | negative regulation of immune response                                   | 0.00800225            | Group1=0.00816441      | A2M, DUSP10, SUSP4, XCL1 |
| GO:0070303 | negative regulation of stress-activated protein kinase signaling cascade | 0.00546576            | Group2=0.002732883     | AIDA, DUSP10, FOXM1      |
| GO:0071300 | cellular response to retinoic acid                                       | 0.00429302            | Group3=0.00429302      | PHC1, RORB, T            |
| GO:1903959 | regulation of anion transmembrane transport                              | 0.002680228           | Group4=0.001675142     | CLCN1, CLCN5, TCAF2      |

**table S10. Genes among outlier windows identified as candidates for the involvement in melanogenesis and RI in sparrows.**

| <b>Gene</b> | <b>Candidate Type</b> | <b>Outlier Type</b> |
|-------------|-----------------------|---------------------|
| APC         | Melanogenesis         | PI                  |
| BNC2        | Melanogenesis         | PI                  |
| KCNN2       | Melanogenesis         | PI                  |
| A2M         | RI                    | PI                  |
| MIA3        | RI                    | PI                  |
| REEP5       | RI                    | PI                  |
| SECISBP2    | RI                    | PI                  |
| ZCCHC6      | RI                    | PI                  |
| ZFAND5      | RI                    | PI                  |
| CRHR1       | Melanogenesis         | HI                  |
| GNAI1       | Melanogenesis         | HI                  |
| PRKAA1      | Melanogenesis         | HI                  |
| RBP1        | Melanogenesis         | HI                  |
| TIMP2       | Melanogenesis         | HI                  |
| WNT4        | Melanogenesis         | HI                  |
| RPS4        | RI                    | HI                  |
| GLI3        | Melanogenesis         | SI                  |
| NOTCH1      | Melanogenesis         | SI                  |
| NOTCH2      | Melanogenesis         | SI                  |
| ETFA        | RI                    | SI                  |
| HSDL2       | RI                    | SI                  |
| LPPR1       | RI                    | SI                  |
| TJP2        | RI                    | SI                  |

**table S11. Significantly enriched GO pathways from ClueGo analysis HI outlier windows with chickens as the reference genome.**

| GO ID      | GO Term                                                            | Corrected Term PValue | Corrected Group PValue | Associated Genes Found                                                                                                                      |
|------------|--------------------------------------------------------------------|-----------------------|------------------------|---------------------------------------------------------------------------------------------------------------------------------------------|
| GO:0008277 | regulation of G-protein coupled receptor protein signaling pathway | 0.022938837           | Group0=6.37189914E-4   | RGS1, RGS13, RGS18, RGS2, RPGRIP1L                                                                                                          |
| GO:0043085 | positive regulation of catalytic activity                          | 0.014007527           | Group1=7.92328152E-4   | CDC42, CRHR1, DENND2D, FGD5, FOXL2, GPR55, PRLR, PSD3, RABIF, RCJMB04_2m10, RGS1, RGS13, RGS18, RGS2, RGS21, RGS4, RGS5, TIMP2, TNNT2, WNT4 |
| GO:0043087 | regulation of GTPase activity                                      | 3.8067453212E-4       | Group1=7.92328152E-4   | DENND2D, FGD5, NTRK2, PSD3, RABIF, RCJMB04_2m10, RGS1, RGS13, RGS18, RGS2, RGS21, RGS4, RGS5, WNT4                                          |
| GO:0043547 | positive regulation of GTPase activity                             | 6.118372717E-4        | Group1=7.92328152E-4   | DENND2D, FGD5, PSD3, RABIF, RCJMB04_2m10, RGS1, RGS13, RGS18, RGS2, RGS21, RGS4, RGS5, WNT4                                                 |
| GO:0051336 | regulation of hydrolase activity                                   | 0.005203648           | Group1=7.92328152E-4   | DENND2D, FGD5, FOXL2, GPR55, NPM1, NTRK2, PSD3, RABIF, RCJMB04_2m10, RGS1, RGS13, RGS18, RGS2, RGS21, RGS4, RGS5, TIMP2, TNNT2, WNT4        |
| GO:0051345 | positive regulation of hydrolase activity                          | 0.001198228           | Group1=7.92328152E-4   | DENND2D, FGD5, FOXL2, GPR55, PSD3, RABIF, RCJMB04_2m10, RGS1, RGS13, RGS18, RGS2, RGS21, RGS4, RGS5, TNNT2, WNT4                            |



**table S12. Significantly enriched GO pathways from ClueGo analysis in SI outlier windows with chickens as the reference genome.**

| GO ID      | GO Term                                             | Corrected Term PValue | Corrected Group PValue | Associated Genes Found      |
|------------|-----------------------------------------------------|-----------------------|------------------------|-----------------------------|
| GO:0003205 | cardiac chamber development                         | 0.03598059            | Group0=0.01907287      | NOTCH1, NOTCH2, NRG1        |
| GO:0007271 | synaptic transmission, cholinergic                  | 0.012704136           | Group1=0.02006942      | CHRNA3, CHRNA5, CHRNB4      |
| GO:0007274 | neuromuscular synaptic transmission                 | 0.002935472           | Group1=0.02006942      | CHRNA3, CHRNA5, CHRNB4      |
| GO:0030326 | embryonic limb morphogenesis                        | 0.042476859           | Group0=0.01907287      | GLI3, NOTCH1, NOTCH2, PTCH1 |
| GO:0030336 | negative regulation of cell migration               | 0.018474666           | Group0=0.01907287      | NOTCH1, NRG1, RCJMB04_5a23  |
| GO:0030534 | adult behavior                                      | 0.048262751           | Group1=0.02006942      | CHRNA3, CHRNA5, CHRNB4, FXN |
| GO:0035094 | response to nicotine                                | 0.002467081           | Group1=0.02006942      | CHRNA3, CHRNA5, CHRNB4      |
| GO:0035095 | behavioral response to nicotine                     | 1.156799262E-4        | Group1=0.02006942      | CHRNA3, CHRNA5, CHRNB4      |
| GO:0035113 | embryonic appendage morphogenesis                   | 0.042689473           | Group0=0.01907287      | GLI3, NOTCH1, NOTCH2, PTCH1 |
| GO:0035264 | multicellular organism growth                       | 0.018474666           | Group2=0.01847467      | FXN, NOTCH2, PTCH1          |
| GO:0043279 | response to alkaloid                                | 0.039772867           | Group1=0.02006942      | CHRNA3, CHRNA5, CHRNB4      |
| GO:0048663 | neuron fate commitment                              | 0.041401127           | Group0=0.01907287      | GLI3, NOTCH1, NRG1          |
| GO:0061005 | cell differentiation involved in kidney development | 0.013790996           | Group0=0.01907287      | GLI3, NOTCH1, PTCH1         |
| GO:0099565 | chemical synaptic transmission, postsynaptic        | 0.041401127           | Group1=0.02006942      | CHRNA3, CHRNA5, CHRNB4      |

**table S13. Significantly enriched GO pathways from ClueGo analysis in PI outlier windows with chickens as the reference genome.**

| GO ID      | GO Term                                                                  | Corrected Term PValue | Corrected Group PValue | Associated Genes Found          |
|------------|--------------------------------------------------------------------------|-----------------------|------------------------|---------------------------------|
| GO:0030336 | negative regulation of cell migration                                    | 0.024126799           | Group0=0.024126799     | EPHA1, MCC, MIA3                |
| GO:0032873 | negative regulation of stress-activated MAPK cascade                     | 0.001261716           | Group1=0.003575856     | AIDA, DUSP10, RCJMB04_8e18      |
| GO:0043409 | negative regulation of MAPK cascade                                      | 0.003575856           | Group1=0.003575856     | AIDA, APC, DUSP10, RCJMB04_8e18 |
| GO:0070303 | negative regulation of stress-activated protein kinase signaling cascade | 0.001261716           | Group1=0.003575856     | AIDA, DUSP10, RCJMB04_8e18      |
